# Supplementary material for: Effect of Processing Intensity on Immunologically Active Bovine Milk Serum Proteins
Source: PubMed Central journal article supplement (PMC5622723; doi:10.3390/nu9090963), 2017-08-31
Supplement: nutrients-09-00963-s001.pdf [file nutrients-09-00963-s001.pdf]

**Supplemental Table S1:** Differentiation of Table 3.

| <b>Protein</b> | <b>p-Value</b> | <b>Difference logscale</b> | <b>Full protein name</b>                            | <b>Protein function</b> | <b>farm</b> |
|----------------|----------------|----------------------------|-----------------------------------------------------|-------------------------|-------------|
| A6QNL0         | 0.081671945    | <b>-0.23802192</b>         | <b>Monocyte differentiation antigen CD14</b>        | immunity                | <b>1</b>    |
| F1MCF8         | 0.034750355    | <b>-0.17906498</b>         | <b>Uncharacterized protein</b>                      | immunity                | <b>1</b>    |
| F1MGU7         | 0.256887543    | <b>-0.29739410</b>         | <b>Fibrinogen gamma-B chain</b>                     | blood coagulation       | <b>1</b>    |
| F1MM32         | 0.114634543    | <b>-0.37410274</b>         | <b>Sulfhydryl oxidase</b>                           | enzyme                  | <b>1</b>    |
| F1MMD7         | 0.490982158    | <b>-0.13948175</b>         | <b>Inter-alpha-trypsin inhibitor heavy chain H4</b> | protease inhibitor      | <b>1</b>    |
| F1MR22         | 0.084272485    | <b>-0.40955884</b>         | <b>Uncharacterized protein</b>                      | immunity                | <b>1</b>    |
| F1MUT3         | 0.138322440    | <b>-0.23642798</b>         | <b>Xanthine dehydrogenase/oxidase</b>               | enzyme                  | <b>1</b>    |
| F1MX50         | 0.155685884    | <b>-0.23493682</b>         | <b>Uncharacterized protein</b>                      | cell                    | <b>1</b>    |
| F1MXX6         | 0.196097111    | <b>-0.21122983</b>         | <b>Lactadherin</b>                                  | cell                    | <b>1</b>    |
| F1MZ96         | 0.028505851    | <b>-0.29591851</b>         | <b>Uncharacterized protein</b>                      | unknown                 | <b>1</b>    |
| F1N076         | 0.050156461    | <b>-0.23059976</b>         | <b>Uncharacterized protein</b>                      | cell                    | <b>1</b>    |
| G3N1R1         | 0.081971360    | <b>-0.35570269</b>         | <b>Uncharacterized protein</b>                      | unknown                 | <b>1</b>    |
| G3X6N3         | 0.093323121    | <b>-0.41136014</b>         | <b>Serotransferrin</b>                              | transport               | <b>1</b>    |
| G3X7A5         | 0.074969423    | <b>-0.32985784</b>         | <b>Complement C3</b>                                | immunity                | <b>1</b>    |
| P00735         | 0.246247618    | <b>-0.20028194</b>         | <b>Prothrombin</b>                                  | immunity                | <b>1</b>    |
| P07589         | 0.249664417    | <b>-0.13446460</b>         | <b>Fibronectin</b>                                  | immunity                | <b>1</b>    |
| P10152         | 0.262017558    | <b>-0.24632455</b>         | <b>Angiogenin-1</b>                                 | cell                    | <b>1</b>    |
| P14923         | 0.442842564    | <b>-0.23557883</b>         | <b>Junction plakoglobin</b>                         | contaminant             | <b>1</b>    |
| P17690         | 0.067252125    | <b>-0.19795256</b>         | <b>Beta-2-glycoprotein 1</b>                        | blood                   | <b>1</b>    |

|        |             |                    |                                                     |                       |          |
|--------|-------------|--------------------|-----------------------------------------------------|-----------------------|----------|
|        |             |                    |                                                     | coagulation           |          |
| P24627 | 0.618396262 | <b>-0.05641995</b> | <b>Lactotransferrin</b>                             | immunity              | <b>1</b> |
| P80025 | 0.056354987 | <b>-0.31864315</b> | <b>Lactoperoxidase</b>                              | immunity              | <b>1</b> |
| P80457 | 0.024660244 | <b>-0.48824513</b> | <b>Xanthine dehydrogenase/oxidase</b>               | enzyme                | <b>1</b> |
| P81265 | 0.030342765 | <b>-0.23337220</b> | <b>Polymeric immunoglobulin receptor</b>            | immunity              | <b>1</b> |
| Q08DQ0 | 0.408093065 | <b>-0.18463537</b> | <b>Plakophilin-3</b>                                | cell                  | <b>1</b> |
| Q3MHN2 | 0.161391410 | <b>-0.13610006</b> | <b>Complement component C9</b>                      | immunity              | <b>1</b> |
| A6QNL0 | 0.069013882 | <b>-0.23518111</b> | <b>Monocyte differentiation antigen CD14</b>        | immunity              | <b>2</b> |
| F1MCF8 | 0.015784629 | <b>-0.20428409</b> | <b>Uncharacterized protein</b>                      | immunity              | <b>2</b> |
| F1MGU7 | 0.083850004 | <b>-0.30868066</b> | <b>Fibrinogen gamma-B chain</b>                     | blood<br>coagulation  | <b>2</b> |
| F1MM32 | 0.006709007 | <b>-0.39112003</b> | <b>Sulfhydryl oxidase</b>                           | enzyme                | <b>2</b> |
| F1MMD7 | 0.105977817 | <b>-0.28763775</b> | <b>Inter-alpha-trypsin inhibitor heavy chain H4</b> | protease<br>inhibitor | <b>2</b> |
| F1MR22 | 0.051009420 | <b>-0.43844310</b> | <b>Uncharacterized protein</b>                      | immunity              | <b>2</b> |
| F1MUT3 | 0.008728533 | <b>-0.16801522</b> | <b>Xanthine dehydrogenase/oxidase</b>               | enzyme                | <b>2</b> |
| F1MX50 | 0.039875202 | <b>-0.36328489</b> | <b>Uncharacterized protein</b>                      | cell                  | <b>2</b> |
| F1MXX6 | 0.067107745 | <b>-0.28572580</b> | <b>Lactadherin</b>                                  | cell                  | <b>2</b> |
| F1MZ96 | 0.033714785 | <b>-0.29583862</b> | <b>Uncharacterized protein</b>                      | unknown               | <b>2</b> |
| F1N076 | 0.014556345 | <b>-0.23929233</b> | <b>Uncharacterized protein</b>                      | cell                  | <b>2</b> |
| G3N1R1 | 0.079212935 | <b>-0.24260691</b> | <b>Uncharacterized protein</b>                      | unknown               | <b>2</b> |
| G3X6N3 | 0.058801881 | <b>-0.36820290</b> | <b>Serotransferrin</b>                              | transport             | <b>2</b> |
| G3X7A5 | 0.025457293 | <b>-0.33343274</b> | <b>Complement C3</b>                                | immunity              | <b>2</b> |
| P00735 | 0.189244691 | <b>-0.18823088</b> | <b>Prothrombin</b>                                  | immunity              | <b>2</b> |
| P07589 | 0.001882570 | <b>-0.16339849</b> | <b>Fibronectin</b>                                  | immunity              | <b>2</b> |

|        |             |                    |                                                     |                    |          |
|--------|-------------|--------------------|-----------------------------------------------------|--------------------|----------|
| P10152 | 0.265167328 | <b>-0.16016051</b> | <b>Angiogenin-1</b>                                 | cell               | <b>2</b> |
| P14923 | 0.066201298 | <b>-0.26988851</b> | <b>Junction plakoglobin</b>                         | contaminant        | <b>2</b> |
| P17690 | 0.034045350 | <b>-0.17825876</b> | <b>Beta-2-glycoprotein 1</b>                        | blood coagulation  | <b>2</b> |
| P24627 | 0.606428473 | <b>-0.10691213</b> | <b>Lactotransferrin</b>                             | immunity           | <b>2</b> |
| P80025 | 0.015727966 | <b>-0.40803462</b> | <b>Lactoperoxidase</b>                              | immunity           | <b>2</b> |
| P80457 | 0.017164248 | <b>-0.45127591</b> | <b>Xanthine dehydrogenase/oxidase</b>               | enzyme             | <b>2</b> |
| P81265 | 0.076082396 | <b>-0.31250532</b> | <b>Polymeric immunoglobulin receptor</b>            | immunity           | <b>2</b> |
| Q08DQ0 | 0.568689620 | <b>-0.07368748</b> | <b>Plakophilin-3</b>                                | cell               | <b>2</b> |
| Q3MHN2 | 0.038221029 | <b>-0.32713635</b> | <b>Complement component C9</b>                      | immunity           | <b>2</b> |
| A6QNL0 | 0.808810787 | <b>-0.04043559</b> | <b>Monocyte differentiation antigen CD14</b>        | immunity           | <b>3</b> |
| F1MCF8 | 0.102303854 | <b>-0.11513041</b> | <b>Uncharacterized protein</b>                      | immunity           | <b>3</b> |
| F1MGU7 | 0.530105296 | <b>-0.26148465</b> | <b>Fibrinogen gamma-B chain</b>                     | blood coagulation  | <b>3</b> |
| F1MM32 | 0.366806380 | <b>-0.30728700</b> | <b>Sulfhydryl oxidase</b>                           | enzyme             | <b>3</b> |
| F1MMD7 | 0.706563764 | <b>-0.03510671</b> | <b>Inter-alpha-trypsin inhibitor heavy chain H4</b> | protease inhibitor | <b>3</b> |
| F1MR22 | 0.290188981 | <b>-0.28563547</b> | <b>Uncharacterized protein</b>                      | immunity           | <b>3</b> |
| F1MUT3 | 0.053002049 | <b>-0.56981654</b> | <b>Xanthine dehydrogenase/oxidase</b>               | enzyme             | <b>3</b> |
| F1MX50 | 0.324407131 | <b>-0.19072733</b> | <b>Uncharacterized protein</b>                      | cell               | <b>3</b> |
| F1MXX6 | 0.382993501 | <b>-0.11720980</b> | <b>Lactadherin</b>                                  | cell               | <b>3</b> |
| F1MZ96 | 0.317901367 | <b>-0.19368184</b> | <b>Uncharacterized protein</b>                      | unknown            | <b>3</b> |
| F1N076 | 0.082822215 | <b>-0.19684531</b> | <b>Uncharacterized protein</b>                      | cell               | <b>3</b> |
| G3N1R1 | 0.237873253 | <b>-0.28592347</b> | <b>Uncharacterized protein</b>                      | unknown            | <b>3</b> |
| G3X6N3 | 0.238346830 | <b>-0.23144136</b> | <b>Serotransferrin</b>                              | transport          | <b>3</b> |

|        |             |                    |                                          |                      |          |
|--------|-------------|--------------------|------------------------------------------|----------------------|----------|
| G3X7A5 | 0.203309875 | <b>-0.18251452</b> | <b>Complement C3</b>                     | immunity             | <b>3</b> |
| P00735 | 0.435981155 | <b>-0.07472569</b> | <b>Prothrombin</b>                       | immunity             | <b>3</b> |
| P07589 | 0.074917993 | <b>-0.25812729</b> | <b>Fibronectin</b>                       | immunity             | <b>3</b> |
| P10152 | 0.329023124 | <b>-0.22825551</b> | <b>Angiogenin-1</b>                      | cell                 | <b>3</b> |
| P14923 | 0.717283262 | <b>-0.17966716</b> | <b>Junction plakoglobin</b>              | contaminant          | <b>3</b> |
| P17690 | 0.142082287 | <b>-0.07824901</b> | <b>Beta-2-glycoprotein 1</b>             | blood<br>coagulation | <b>3</b> |
| P24627 | 0.891718223 | <b>-0.02615023</b> | <b>Lactotransferrin</b>                  | immunity             | <b>3</b> |
| P80025 | 0.146780262 | <b>-0.23888622</b> | <b>Lactoperoxidase</b>                   | immunity             | <b>3</b> |
| P80457 | 0.226280758 | <b>-0.32739478</b> | <b>Xanthine dehydrogenase/oxidase</b>    | enzyme               | <b>3</b> |
| P81265 | 0.147299243 | <b>-0.15649395</b> | <b>Polymeric immunoglobulin receptor</b> | immunity             | <b>3</b> |
| Q08DQ0 | 0.482109041 | <b>-0.20910686</b> | <b>Plakophilin-3</b>                     | cell                 | <b>3</b> |
| Q3MHN2 | 0.465662798 | <b>-0.19406143</b> | <b>Complement component C9</b>           | immunity             | <b>3</b> |
